# Supplementary material for: Host serum amyloid A1 facilitates Streptococcus pneumoniae adaptation to acidic stress induced by pneumococcal anaerobic metabolism
Source: Research Square preprint supplement (doi:10.21203/rs.3.rs-5862113/v1), 2025-02-21
Supplement: Supplementary file 1 [file 1ab82f2cfe91e80b956f3d66.docx]

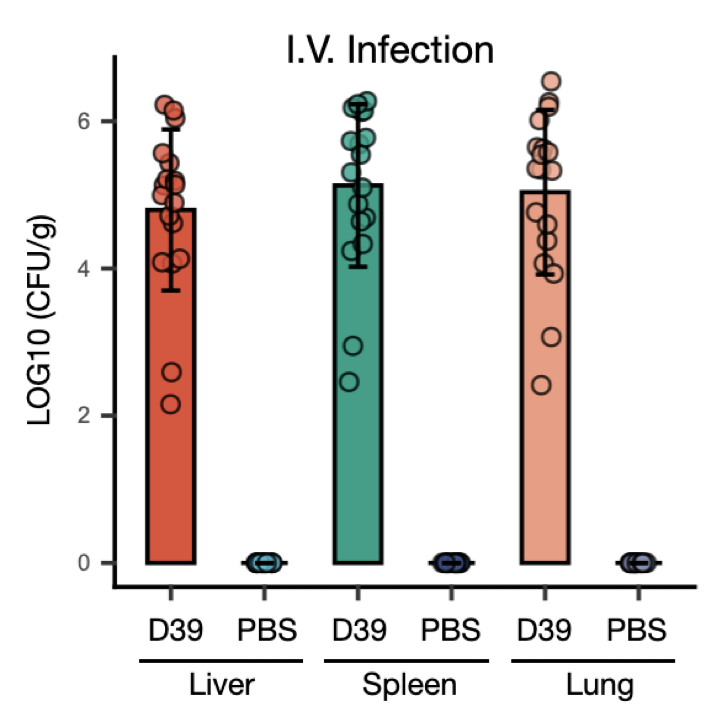


**Fig. S1. *S. pneumoniae* distribution in mice following intravenous infection.**

Detection of *S. pneumoniae* in liver, spleen and lung 24 hours post PBS- or *S. pneumoniae* D39-nasal administration. n=18.

|  |  |  |  |  |  |  |  |  |  |  |  |  |  |  |
| --- | --- | --- | --- | --- | --- | --- | --- | --- | --- | --- | --- | --- | --- | --- |


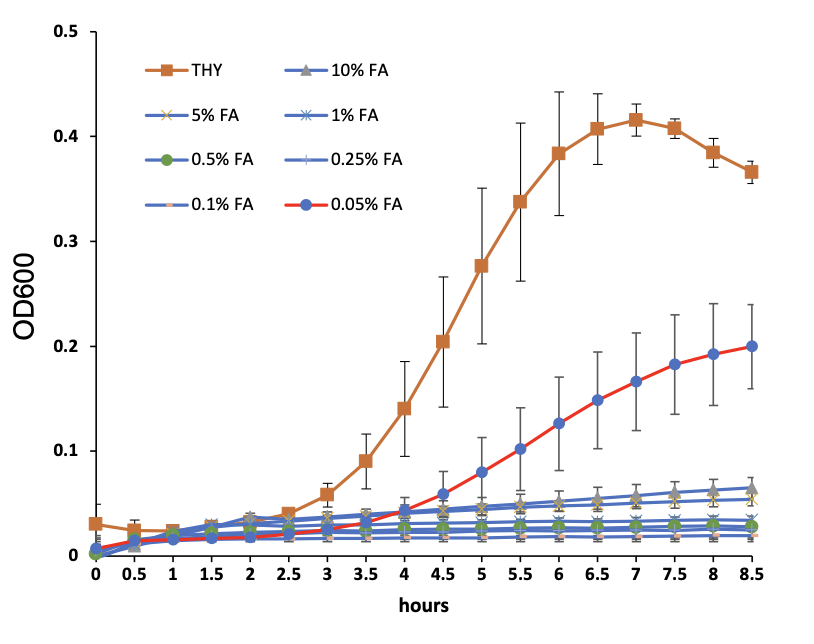


**Fig. S2. Growth of *S. pneumoniae* TIGR4strain in different concentration of formic acid.**

*S. pneumoniae* TIGR4 strain keeps growing in THY broth containing formic acid (0.05%, v/v)


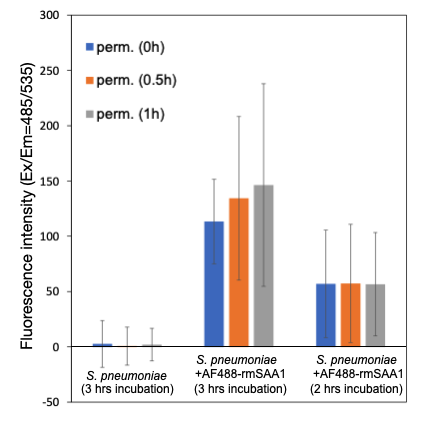


**Fig. S3. Fluorescence intensity increased after permeabilization of AF488-rmSAA1 intake *S. pneumoniae.***

*S. pneumoniae* TIGR4cocultured with AF488-rmSAA1 for 3 hours, and then bacterial bodies were permeabilized with 0.05% Triton X-100, fluorescence intensity increased with the elongtion of permeabilization time. However, the same result was not observed in *S. pneumoniae* TIGR4 cocultured with AF488-rmSAA1 for 2 hours. Blue bars, before permeabilization; orange bars, permeabilization for 30 minutes, grey bars, permeabilization for 1 hour.


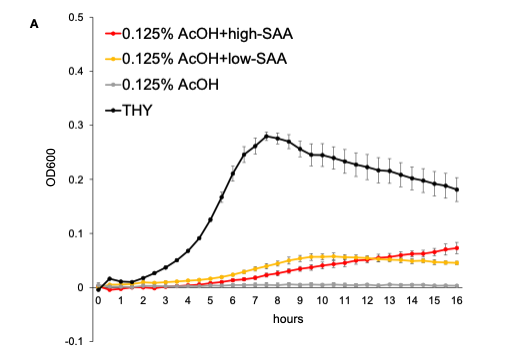

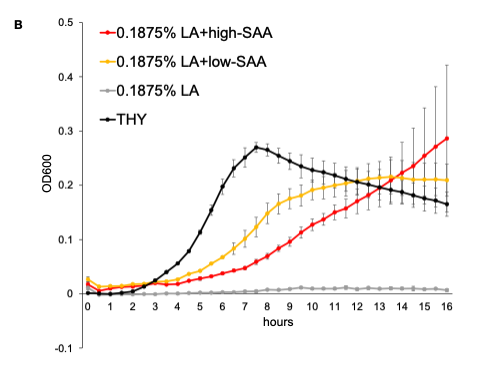


**Fig. S4. Growth curve of *S. pneumoniae* in lethal concentration of acetic and lactic acid with no serum, serum high-SAA1 or serum low-SAA1.**

Minimal effects of SAA1 on *S. pneumoniae* resistance against acetic and lactic acid. AcOH, acetic acid; LA, lactic acid. Red lines, THY broth containing lethal concentration of acid and 10% serum high-SAA ; yellow lines, THY broth containing lethal concentration of acid and 10% serum low-SAA; grey lines, THY broth containing lethal concentration of acid without serum; black lines, THY broth.


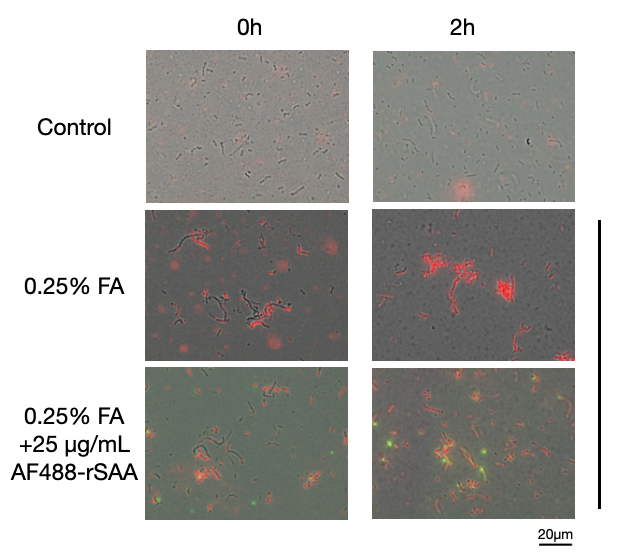


**Fig. S5. Intake of SAA1 facilitate *S. pneumoniae resistance* to formic acid**

Fluorescence microscope showed that intake of AF488-rmSAA1 keeps *S. pneumoniae* alive in lethal concentration of formic acid. Green, AF488-rmSAA1; red, dead bacteria.

|  |  |  |  |  |
| --- | --- | --- | --- | --- |

**Table. S1. Molarity and pH of different concenration (%, v/v) of acetic acid**

| **Acetic acid** | | | | |
| --- | --- | --- | --- | --- |
| % (v/v) | 0.05% | 0.08% | 0.125% | 0.15% |
| Molarity (mM) | 8.3261 | 13.3218 | 20.8153 | 24.9784 |
| pH | 6 | 5.875 | 5.5 | 4.875 |

Red, *S. pneumoniae* D39 remained growing; Black, *S. pneumoniae* D39 was inhibited.

**Table. S2. Molarity and pH of different concenration (%, v/v) of lactic acid**

| **Lactic acid** | | | | |
| --- | --- | --- | --- | --- |
| % (v/v) | 0.10% | 0.125% | 0.1875% | 0.20% |
| Molarity (mM) | 11.1012 | 13.8766 | 20.8148 | 22.2025 |
| pH | 6.7436335 | 4.625 | 4.875 | 4.375 |

Red, *S. pneumoniae* D39 remained growing; Black, *S. pneumoniae* D39 was inhibited.

**Table. S3. Molarity and pH of different concenration (%, v/v) of formic acid**

| **Formic acid** | | | | |
| --- | --- | --- | --- | --- |
| % (v/v) | 0.0250% | 0.05% | 0.075% | 0.10% |
| Molarity (mM) | 5.4322 | 10.8652 | 16.2937 | 21.725 |
| pH | 7.07674125 | 6.4872235 | 5.375 | 4.625 |

Red, *S. pneumoniae* D39 remained growing; Black, *S. pneumoniae* D39 was inhibited.
